# Supplementary material for: A tunable temperature-responsive and tough platform for controlled drug delivery
Source: Royal Society of Chemistry journal article supplement (doi:10.1039/d1nj01356d), 2021-01-01
Supplement: d1nj01356d1.pdf [file d1nj01356d1.pdf]

## Supplementary Information

For

### A Tunable Temperature-Responsive and Tough Platform for Controlled Drug Delivery

Shuting Gao<sup>1</sup>, Aying Zhou<sup>1</sup>, Bin Cao<sup>1</sup>, Jing Wang<sup>2</sup>, Fanghua Li<sup>1</sup>, Guosheng Tang<sup>1</sup>, Zhicheng Jiang<sup>1</sup>, Anquan Yang<sup>2</sup>, Ranhua Xiong<sup>3\*</sup>, Jiandu Lei<sup>4\*</sup>, Chaobo Huang<sup>1,5\*</sup>

<sup>1</sup>College of Chemical Engineering, Jiangsu Co-Innovation Center of Efficient Processing and Utilization of Forest Resources, Nanjing Forestry University, Nanjing, 210037, P. R. China

<sup>2</sup>OSM Biological co., Ltd, Deqing, 313200, P.R. China

<sup>3</sup>Lab General Biochemistry & Physical Pharmacy, Department of Pharmaceutics, Ghent University, 9000, Belgium

<sup>4</sup>Beijing Key Laboratory of Lignocellulosic Chemistry, and MOE Engineering Research Center of Forestry Biomass Materials and Bioenergy, Beijing Forestry University, Beijing, 100083, P. R. China

<sup>5</sup>Joint Laboratory of Advanced Biomedical Technology (NFU-UGent), Laboratory of Biopolymer based Functional Materials, Nanjing Forestry University, Nanjing, 210037, P. R. China

Email: [huangchaobo@njfu.edu.cn](mailto:huangchaobo@njfu.edu.cn)

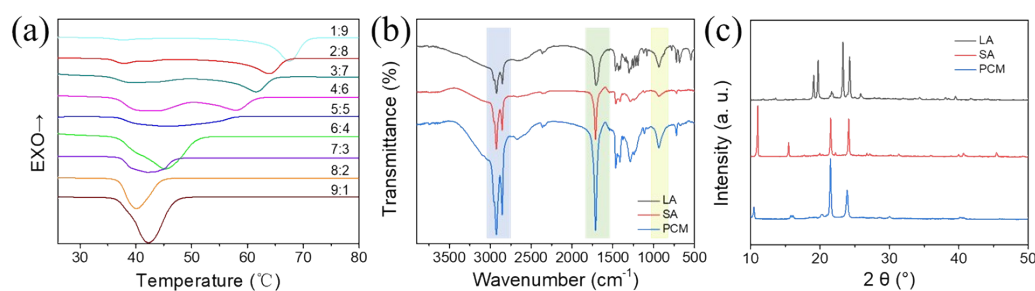

**Fig. S1.** Characterization of PCM. (a) DSC thermograms for the binary eutectic mixture of LA and SA.

(b) FT-IR spectra and (c) XRD patterns of PCM.

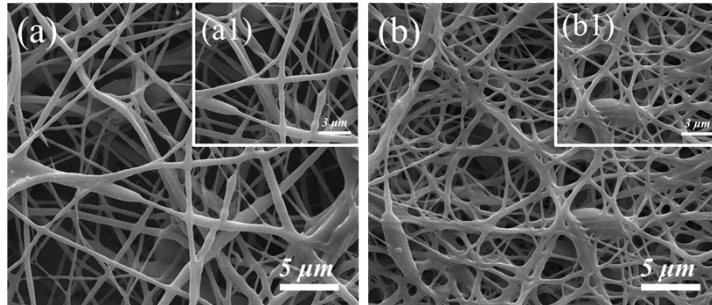

**Fig. S2.** Characterization of the morphology of the fibers. SEM graphs of (a) Pure PCL fibers and (b) Pure PU fibers.

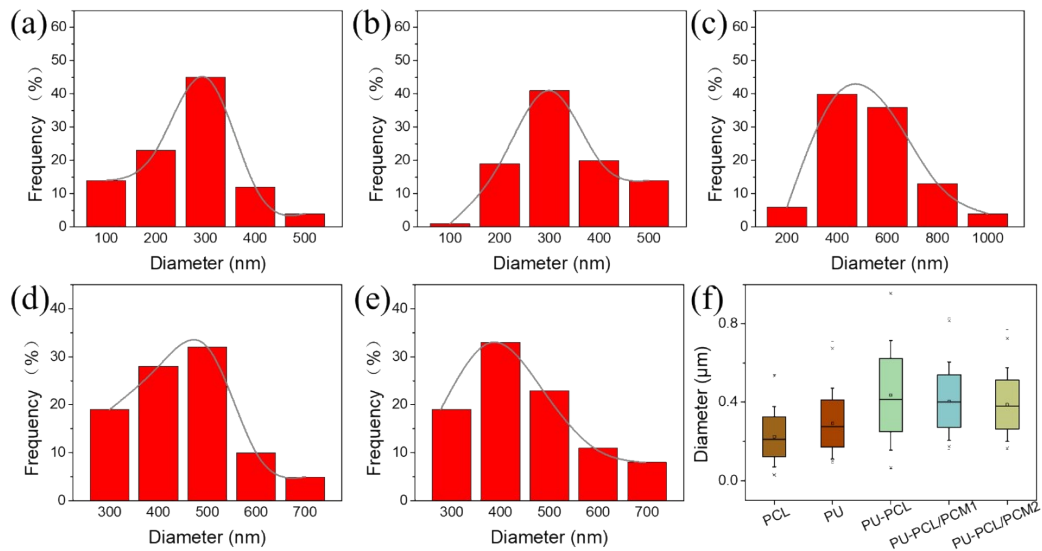

**Fig. S3.** Fiber diameter histograms of (a) Pure PCL fibrous membranes, (b) Pure PU fibrous membranes, (c) PU-PCL coaxial fibrous membranes, (d) PU-PCL/PCM1 coaxial fibrous membranes ( $f_{PCM}=0.05$ ) and (e) PU-PCL/PCM2 coaxial fibrous membranes ( $f_{PCM}=0.1$ ). (f) Box-plot for diameter (distribution) of the different fibrous membranes.

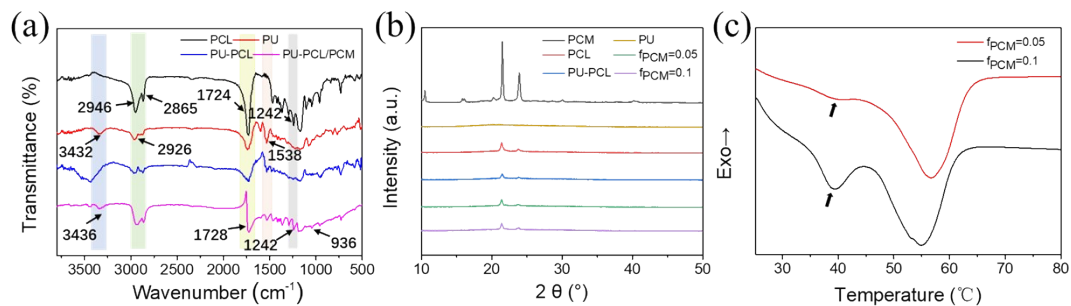

**Fig. S4.** Characterization of fibers. (a) FT-IR spectra and (b) XRD patterns of fibers. (c) DSC thermograms for the PU-PCL/PCM core-shell fibers of  $f_{PCM}=0.05$  and  $0.1$ .

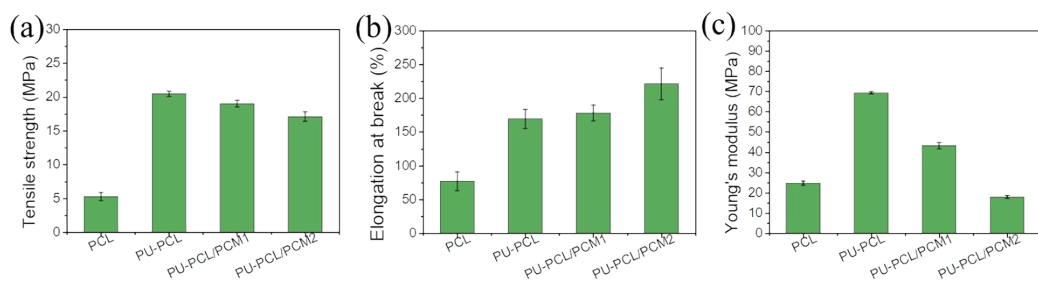

**Fig. S5.** Mechanical property of fibers. (a) Tensile strength, (b) Elongation at break and (c) Young's modulus of different fibrous membranes.

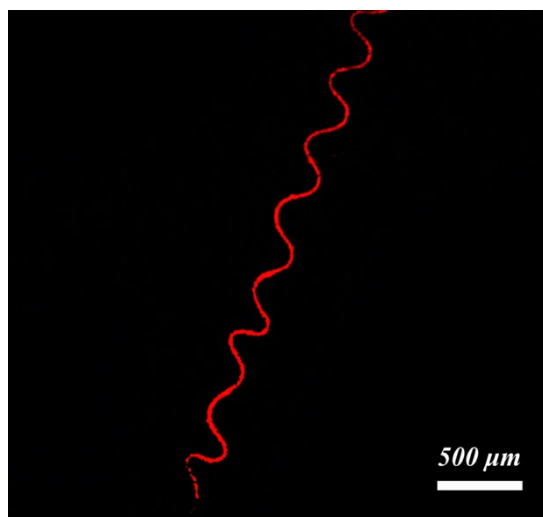

**Figure S6.** Fluorescence microscopy on Rhodamine B-loaded PU-PCL/PCM1 coaxial fiber.

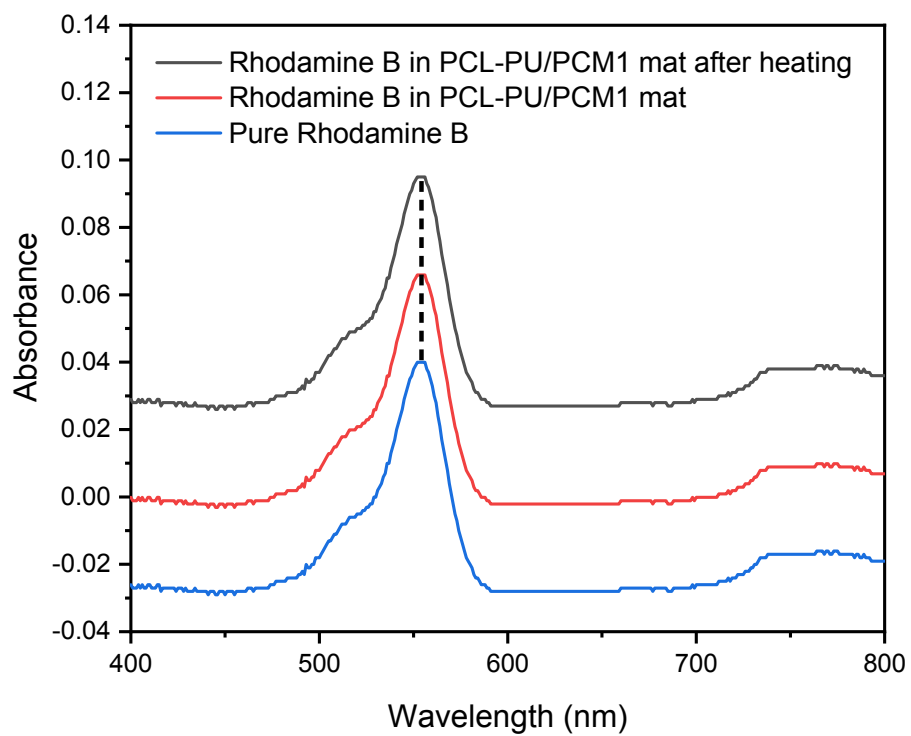

**Figure S7.** UV-VIS spectra of free Rhodamine B and released media of PU-PCL/PCM1.

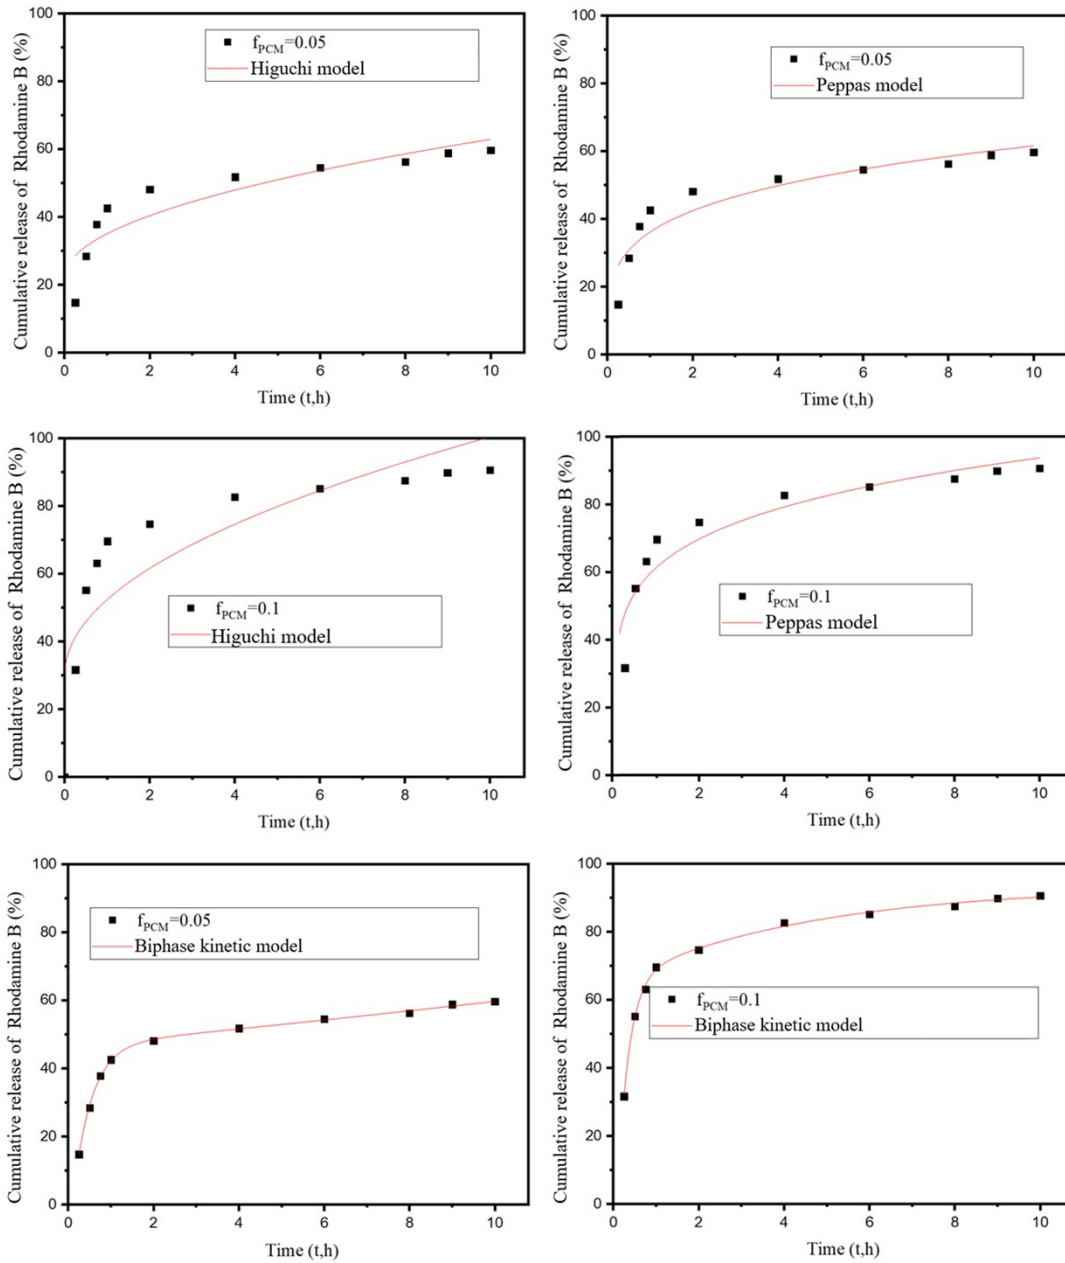

**Figure S8.** Fitted curves for release kinetic models of PU-PCL/PCM1 ( $f_{PCM}=0.05$ ) and PU-PCL/PCM2 ( $f_{PCM}=0.1$ )

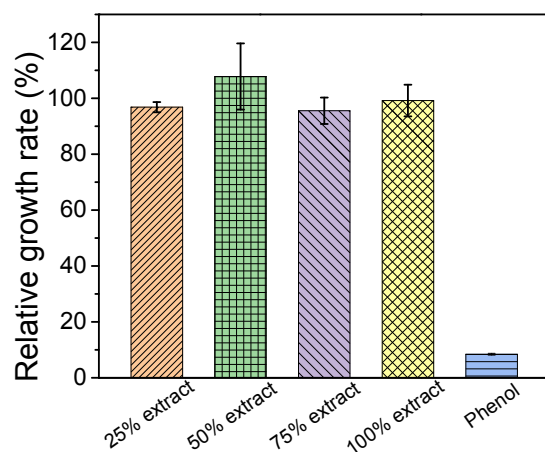

**Fig. S9.** L929 cell viability quantified by MTT assay. The cells were treated with extract of PU-PCL/PCM fiber membranes.

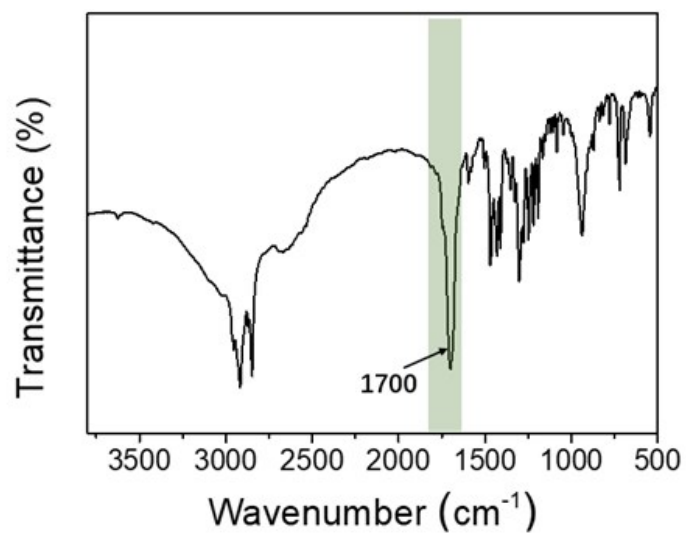

**Figure S10.** FT-IR spectra of HCPT loaded PU-PCL/PCM1 fiber.

**Table S1.** Mechanical Properties of the Different Fibers<sup>a</sup>

<sup>a</sup>Each sample was evaluated for three times. The mean values and the corresponding standard deviations are displayed.

| Sample      | A             | $\alpha$       | B             | $\beta$        | R <sup>2</sup> |
|-------------|---------------|----------------|---------------|----------------|----------------|
| PU-PCL/PCM1 | 0.5785±0.0021 | -2.3159±0.1819 | 0.7002±0.0031 | -0.0171±0.0068 | 0.99865        |
| PU-PCL/PCM2 | 0.2813±0.0019 | -0.2188±0.0661 | 0.9086±0.0083 | -3.8156±0.5184 | 0.99837        |

**Table S2.** Specific fitting parameters of Biexponential and Biphase equations

| Fibers      | Tensile strength (MPa) | Elongation at break (%) | Young's modulus (MPa) |
|-------------|------------------------|-------------------------|-----------------------|
| PCL         | 5.3±0.6                | 77.2±13.6               | 24.8±1.1              |
| PU-PCL      | 20.5±0.4               | 169.5±14.1              | 69.3±0.6              |
| PU-PCL/PCM1 | 19±0.5                 | 178.3±11.5              | 43.3±1.6              |
| PU-PCL/PCM2 | 17.1±0.7               | 221.4±23.7              | 41.2±0.8              |
